# Supplementary material
Source: PubMed Central journal article supplement (PMC7304569)
Supplement: NIHMS1038980-supplement-Supp__Table_2.pdf [file NIHMS1038980-supplement-Supp__Table_2.pdf]

Supp. Table 2. Motion excluded participants by ABIDE site.

| Site                 | ASD | NT |
|----------------------|-----|----|
| Site 1 – CALTECH     | 3   | 4  |
| Site 2 – CMU         | -   | -  |
| Site 3 –<br>LEUVEN_1 | -   | -  |
| Site 4 –<br>MAX_MUN  | -   | 2  |
| Site 5 – NYU         | -   | -  |
| Site 6 - OLIN        | 2   | -  |
| Site 7 – PITT        | -   | -  |
| Site 8 – SBL         | 2   | 15 |
| Site 9 - TRINITY     | 1   | -  |
| Site 10 – UM_1       | -   | 2  |
| Site 11 – UM_2       | -   | -  |
| Site 12 - USM        | -   | -  |
