# Supplementary material
Source: PubMed Central journal article supplement (PMC7304569)
Supplement: NIHMS1038980-supplement-Supp__Table_4.pdf [file NIHMS1038980-supplement-Supp__Table_4.pdf]

Supp. Table 4. Demographics by ABIDE site.

| Site              | Measure            | ASD<br>Mean $\pm$ SD | NT<br>Mean $\pm$ SD |
|-------------------|--------------------|----------------------|---------------------|
| Site 1 – CALTECH  | Participants (M/F) | 9/2                  | 8/2                 |
|                   | Age (years)        | 30.1 $\pm$ 12.4      | 34.0 $\pm$ 11.8     |
|                   | FIQ                | 104.0 $\pm$ 11.2     | 112.7 $\pm$ 8.2     |
| Site 2 – CMU      | Participants (M/F) | 9/3                  | 9/3                 |
|                   | Age (years)        | 25.5 $\pm$ 4.9       | 27 $\pm$ 6.0        |
|                   | FIQ                | 116.0 $\pm$ 11.1     | 114.6 $\pm$ 10.1    |
| Site 3 – LEUVEN_1 | Participants (M/F) | 13/0                 | 14/0                |
|                   | Age (years)        | 21.8 $\pm$ 4.3       | 23.4 $\pm$ 3.0      |
|                   | FIQ                | 108.0 $\pm$ 12.4     | 113.4 $\pm$ 12.2    |
| Site 4 – MAX_MUN  | Participants (M/F) | 11/2                 | 21/4                |
|                   | Age (years)        | 34.6 $\pm$ 12.7      | 29.8 $\pm$ 7.5      |
|                   | FIQ                | 113.8 $\pm$ 12.6     | 111.6 $\pm$ 8.6     |
| Site 5 – NYU      | Participants (M/F) | 10/4                 | 24/6                |
|                   | Age (years)        | 26.1 $\pm$ 6.2       | 24.1 $\pm$ 4.0      |
|                   | FIQ                | 108.6 $\pm$ 15.7     | 115.1 $\pm$ 10.1    |
| Site 6 - OLIN     | Participants (M/F) | 4/1                  | 3/1                 |
|                   | Age (years)        | 19.0 $\pm$ 1.0       | 20.5 $\pm$ 0.6      |
|                   | FIQ                | 119.8 $\pm$ 12.5     | 123.0 $\pm$ 14.2    |
| Site 7 – PITT     | Participants (M/F) | 11/0                 | 10/1                |
|                   | Age (years)        | 25.4 $\pm$ 5.2       | 24.9 $\pm$ 5.4      |
|                   | FIQ                | 116.5 $\pm$ 14.5     | 115.1 $\pm$ 8.8     |
| Site 8 – SBL      | Participants (M/F) | 10/0                 | 0/0                 |
|                   | Age (years)        | 37.8 $\pm$ 11.6      | N/A                 |
|                   | FIQ                | 111.1 $\pm$ 12.0     | N/A                 |
| Site 9 - TRINITY  | Participants (M/F) | 9/0                  | 10/0                |
|                   | Age (years)        | 20.9 $\pm$ 2.5       | 20.9 $\pm$ 2.4      |
|                   | FIQ                | 111.6 $\pm$ 17.9     | 115.1 $\pm$ 9.0     |
| Site 10 – UM_1    | Participants (M/F) | 1/1                  | 3/1                 |
|                   | Age (years)        | 18.3 $\pm$ 0.4       | 18.8 $\pm$ 0.4      |
|                   | FIQ                | 103.3 $\pm$ 6.7      | 115.1 $\pm$ 4.6     |
| Site 11 – UM_2    | Participants (M/F) | 0/0                  | 2/0                 |
|                   | Age (years)        | N/A                  | 27.8 $\pm$ 1.4      |
|                   | FIQ                | N/A                  | 114.5 $\pm$ 0.7     |
| Site 12 - USM     | Participants (M/F) | 32/0                 | 28/0                |
|                   | Age (years)        | 26.9 $\pm$ 7.3       | 25.4 $\pm$ 6.1      |
|                   | FIQ                | 103.9 $\pm$ 16.9     | 114.6 $\pm$ 13.9    |
| Site 13 - BNI     | Participants (M/F) | 25/0                 | 22/0                |
|                   | Age (years)        | 50.8 $\pm$ 7.1       | 49.8 $\pm$ 6.70     |
|                   | FIQ                | 105.6 $\pm$ 17.8     | 110.9 $\pm$ 13.2    |
